# Supplementary material for: Investigation of Daytime Peak Loads to Improve the Power Generation Costs of Solar-Integrated Power Systems
Source: Hindawi journal article supplement (doi:10.1155/2019/5986874), 2019-11-11
Supplement: f1 [file 5986874.f1.pdf]

Table S1: Characteristics of the six thermal generation units [27].

| Unit | Power limits    |                 | Fuel cost coefficients |       |       |       |       | Ramp rate limits |             |
|------|-----------------|-----------------|------------------------|-------|-------|-------|-------|------------------|-------------|
|      | $P_{imin}$ (MW) | $P_{imax}$ (MW) | $a_i$                  | $b_i$ | $c_i$ | $e_i$ | $f_i$ | $UR$ (MW/h)      | $DR$ (MW/h) |
| 1    | 50              | 200             | 0.00375                | 2     | 0     | 18    | 0.037 | 50               | 50          |
| 2    | 20              | 80              | 0.0175                 | 1.75  | 0     | 16    | 0.038 | 16               | 16          |
| 3    | 15              | 50              | 0.0625                 | 1     | 0     | 14    | 0.04  | 10               | 10          |
| 4    | 10              | 35              | 0.00834                | 3.25  | 0     | 12    | 0.045 | 7                | 7           |
| 5    | 10              | 30              | 0.025                  | 3     | 0     | 13    | 0.042 | 6                | 6           |
| 6    | 12              | 40              | 0.025                  | 3     | 0     | 13.5  | 0.041 | 8                | 8           |

$$B_{ij} = \begin{vmatrix} 2.2 & 1.1 & -0.1 & -0.1 & 0.1 & 0.4 \\ 1.1 & 1.6 & 0 & -0.1 & 0 & 0.3 \\ -0.1 & 0 & 2.4 & -1 & -1 & -0.7 \\ -0.1 & -0.1 & -1 & 1.9 & 0.7 & 0.4 \\ 0.1 & 0 & -1 & 0.7 & 1.6 & 0 \\ 0.4 & 0.3 & -0.7 & 0.4 & 0 & 2.6 \end{vmatrix} \cdot 0.0001/MW \quad (S1)$$

Table S2: Twenty-four-hour load demand profile for the six-unit test system [27].

|           |     |     |     |     |       |     |     |     |     |     |     |     |
|-----------|-----|-----|-----|-----|-------|-----|-----|-----|-----|-----|-----|-----|
| Time (h)  | 1   | 2   | 3   | 4   | 5     | 6   | 7   | 8   | 9   | 10  | 11  | 12  |
| Load (MW) | 166 | 196 | 229 | 267 | 283.4 | 272 | 246 | 213 | 192 | 161 | 147 | 160 |
| Time (h)  | 13  | 14  | 15  | 16  | 17    | 18  | 19  | 20  | 21  | 22  | 23  | 24  |
| Load (MW) | 170 | 185 | 208 | 232 | 246   | 241 | 236 | 225 | 204 | 182 | 161 | 131 |

Table S3: Results of the optimal 24-h DED of the thermal generation units using PSO.

| Time<br>(h) | Generator power (MW) |         |         |         |         |         | Cost (\$/h) |
|-------------|----------------------|---------|---------|---------|---------|---------|-------------|
|             | 1                    | 2       | 3       | 4       | 5       | 6       |             |
| 1           | 50.0004              | 44.0000 | 20.0004 | 18.0021 | 14.0000 | 32.0000 | 494.957     |
| 2           | 99.9090              | 36.3960 | 17.7392 | 11.5632 | 10.0000 | 24.0081 | 543.022     |
| 3           | 135.1502             | 43.6899 | 18.3693 | 12.1942 | 10.5102 | 16.1871 | 629.571     |
| 4           | 170.1084             | 45.2429 | 20.2699 | 15.4601 | 13.0088 | 12.4327 | 760.191     |
| 5           | 200.0000             | 40.2030 | 19.4766 | 12.3096 | 10.3672 | 12.7329 | 820.535     |
| 6           | 164.3107             | 53.0030 | 20.6627 | 17.8640 | 11.5608 | 12.8900 | 793.292     |
| 7           | 168.4371             | 37.4247 | 15.4756 | 11.1500 | 10.0254 | 12.0792 | 688.240     |
| 8           | 121.6852             | 44.3556 | 18.3827 | 10.5806 | 10.9908 | 12.0114 | 578.256     |
| 9           | 120.8827             | 28.3946 | 15.0000 | 10.0084 | 10.0000 | 12.0075 | 512.258     |
| 10          | 81.3154              | 33.1861 | 17.9705 | 10.0497 | 10.0440 | 12.0445 | 420.151     |
| 11          | 80.8889              | 20.9175 | 15.5303 | 10.0000 | 10.0721 | 12.0000 | 382.867     |
| 12          | 95.3589              | 20.9102 | 15.0832 | 10.0000 | 10.0752 | 12.0342 | 419.943     |
| 13          | 105.3467             | 20.1198 | 15.0000 | 10.5896 | 10.1488 | 12.3411 | 446.803     |
| 14          | 122.0215             | 20.0000 | 15.0203 | 10.0000 | 10.0002 | 12.0008 | 487.645     |
| 15          | 146.4532             | 20.0012 | 15.0000 | 10.0000 | 10.1237 | 12.0149 | 557.030     |
| 16          | 172.6032             | 20.0000 | 15.0035 | 10.0116 | 10.0017 | 12.0000 | 639.052     |
| 17          | 180.3679             | 26.2880 | 15.8509 | 10.0000 | 10.1153 | 12.1993 | 697.265     |
| 18          | 147.1628             | 41.7444 | 20.0050 | 14.7090 | 12.1700 | 12.0062 | 681.223     |
| 19          | 170.9440             | 25.7444 | 15.0021 | 10.0123 | 10.0000 | 12.0089 | 649.839     |
| 20          | 138.1223             | 41.4768 | 18.8175 | 11.1985 | 10.0000 | 13.3715 | 623.265     |
| 21          | 136.5898             | 25.5547 | 15.1016 | 10.3013 | 10.0000 | 12.0008 | 551.412     |
| 22          | 103.1707             | 33.7652 | 16.5101 | 10.0038 | 10.0013 | 12.0608 | 483.490     |
| 23          | 97.1611              | 20.3857 | 15.0282 | 10.0000 | 10.0144 | 12.8061 | 422.920     |
| 24          | 62.1979              | 23.1891 | 15.1922 | 10.0000 | 10.0086 | 12.0013 | 333.134     |
